# Supplementary material for: EMG-based simultaneous and proportional estimation of wrist/hand kinematics in uni-lateral trans-radial amputees
Source: Springer Nature journal article supplement (doi:10.1186/1743-0003-9-42), 2012-06-28

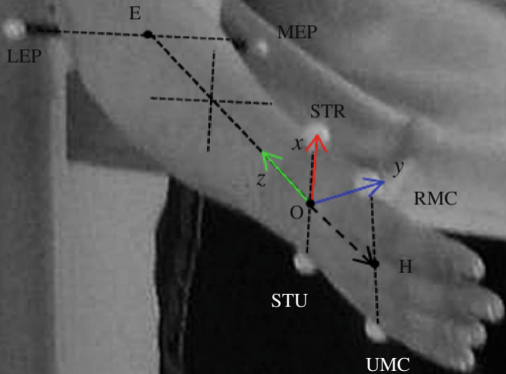

Supplement: 12984_2011_411_MOESM2_ESM.pdf [file 12984_2011_411_MOESM2_ESM.pdf]
